# Supplementary material for: Maternal early mid-pregnancy adiponectin in relation to infant birth weight and the likelihood of being born large-for-gestational-age
Source: Springer Nature journal article supplement (doi:10.1038/s41598-023-48027-2), 2023-11-27
Supplement: MOESM1 [file 41598_2023_48027_MOESM1_ESM.pdf]

## Maternal early mid-pregnancy adiponectin in relation to infant birth weight and the likelihood of being born large-for-gestational-age

Emelie Lindberger MD PhD<sup>1\*</sup>, Anders Larsson MD, PhD<sup>2</sup>, Theodora Kunovac Kallak PhD<sup>1</sup>, Inger Sundström Poromaa MD PhD<sup>1</sup>, Anna-Karin Wikström MD PhD<sup>1</sup>, Anna Österroos MD<sup>1</sup>, Fredrik Ahlsson MD PhD<sup>1</sup>

<sup>1</sup> Department of Women's and Children's Health, Uppsala University, 751 85 Uppsala, Sweden

<sup>2</sup> Department of Medical Sciences, Uppsala University, 751 85 Uppsala, Sweden

**Supplementary Figure S1.** Directed acyclic graph (DAG) used for selection of covariates.

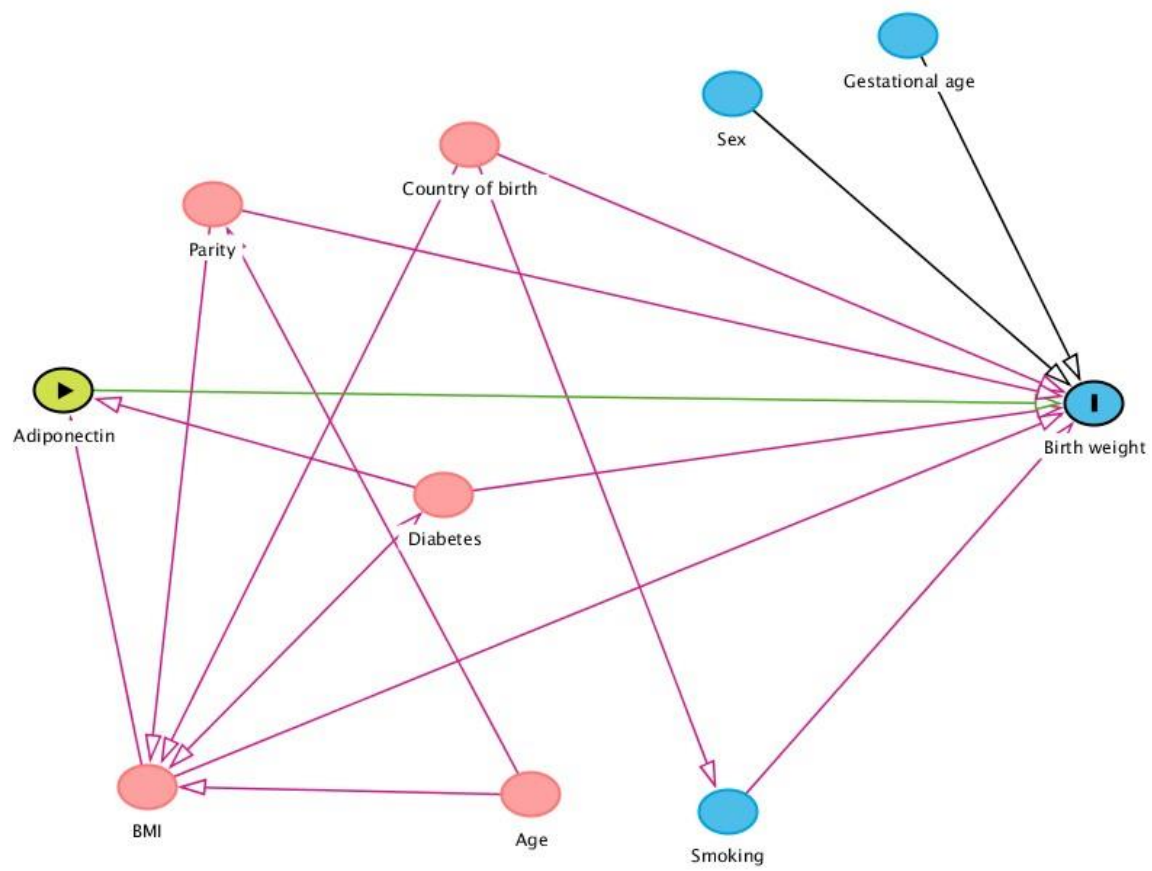

**Supplementary Table S1.** Adiponectin measures in relation to BMI classes defined by the WHO.

| BMI, WHO classification (kg/m <sup>2</sup> ) | N (%)      | Adiponectin (microgram/mL) |      |                  |     |
|----------------------------------------------|------------|----------------------------|------|------------------|-----|
|                                              |            | Min                        | Max  | Mean             | SD  |
| <18.5 (underweight)                          | 0 (%)      | -                          | -    | -                | -   |
| 18.5–24.9 (normal weight)                    | 434 (32.2) | 1.4                        | 18.0 | 6.1 <sup>a</sup> | 2.3 |
| 25.0–29.9 (overweight)                       | 404 (29.9) | 0.5                        | 18.2 | 5.7 <sup>a</sup> | 2.9 |
| 30.0–34.9 (obesity class I)                  | 290 (21.5) | 0.7                        | 8.6  | 2.8 <sup>b</sup> | 1.2 |
| 35.0–39.9 (obesity class II)                 | 162 (12.0) | 0.7                        | 8.2  | 2.7 <sup>c</sup> | 1.3 |
| ≥40.0 (obesity class III)                    | 59 (4.4)   | 1.0                        | 4.3  | 2.3 <sup>d</sup> | 1.0 |

<sup>a</sup> significantly different from all other WHO BMI-classes,  $P = 0.001$ . Kruskal-Wallis test followed by post-hoc paired tests with Bonferroni correction.

<sup>b</sup> significantly different from all other WHO BMI-classes,  $P < 0.001$ , except obesity class II and III. Kruskal-Wallis test followed by post-hoc paired tests with Bonferroni correction.

<sup>c</sup> significantly different from all other WHO BMI-classes,  $P < 0.001$ , except obesity class I and III. Kruskal-Wallis test followed by post-hoc paired tests with Bonferroni correction.

<sup>d</sup> significantly different from all other WHO BMI-classes,  $P < 0.001$ , except obesity class I and II. Kruskal-Wallis test followed by post-hoc paired tests with Bonferroni correction.

BMI, body mass index kg/m<sup>2</sup>; SD, standard deviation

**Supplementary Table S2.** Spearman correlation coefficients for the associations between characteristics of the women and infant birth size.

|                            | Age   | Adiponectin | Infant BWSDS | Birth weight |
|----------------------------|-------|-------------|--------------|--------------|
| <b>Early pregnancy BMI</b> | -0.01 | -0.62*      | 0.16*        | 0.16*        |
| <b>Age</b>                 |       | 0.04        | 0.02         | 0.02         |
| <b>Adiponectin</b>         |       |             | -0.11*       | -0.11*       |
| <b>Infant BWSDS</b>        |       |             |              | 1.00*        |

BWSDS, birth weight standard deviation score; BMI, body mass index.

\* $P < 0.01$ .

**Supplementary Table S3.** Associations between maternal adiponectin levels and infant birth size among women without diabetes mellitus (n=1323).

| Outcome                                      | Unadjusted model |                |          | Adjusted model <sup>a</sup> |               |          |
|----------------------------------------------|------------------|----------------|----------|-----------------------------|---------------|----------|
|                                              | $\beta$          | CI             | <i>P</i> | $\beta$                     | CI            | <i>P</i> |
| <b>Birth weight (g)</b>                      | -14.9            | -24.6 to -5.2  | 0.003    | 0.2                         | -11.2 to 11.6 | 0.970    |
| <b>Birth weight standard deviation score</b> | -0.03            | -0.05 to -0.01 | 0.002    | 0.00                        | -0.02 to 0.02 | 0.974    |

Data are B coefficients ( $\beta$ ) and (95% confidence interval (CI)) for the change in outcome per unit increase in adiponectin (microgram/mL).

Data were analyzed using linear regression models.

<sup>a</sup> Adjustments were made for early pregnancy BMI.

**Supplementary Table S4.** Associations between maternal adiponectin levels and the likelihood of giving birth to an infant large-for-gestational-age (LGA) among women without diabetes mellitus (n=1323).

| Outcome    | Unadjusted model |             |          | Adjusted model <sup>a</sup> |             |          |
|------------|------------------|-------------|----------|-----------------------------|-------------|----------|
|            | OR               | CI          | <i>P</i> | OR                          | CI          | <i>P</i> |
| <b>LGA</b> | 0.93             | 0.87 – 0.99 | 0.028    | 1.00                        | 0.93 – 1.08 | 0.938    |

Data are odds ratios (OR) (95% confidence interval (CI)) for the change in outcome per unit increase in adiponectin (microgram/mL).

Data were analyzed using logistic regression models.

<sup>a</sup> Adjustments were made for early pregnancy BMI.

**Supplementary Table S5.** Associations between maternal adiponectin levels and infant birth weight, female and male infants analyzed separately.

| <b>Females (n =650)</b>                      | <b>Unadjusted model</b> |                |          | <b>Adjusted model <sup>a</sup></b> |               |          |
|----------------------------------------------|-------------------------|----------------|----------|------------------------------------|---------------|----------|
|                                              | $\beta$                 | CI             | <i>P</i> | $\beta$                            | CI            | <i>P</i> |
| <b>Birth weight (g)</b>                      | -29.2                   | -43.6 to -14.8 | <0.001   | -3.6                               | -20.1 to 12.9 | 0.669    |
| <b>Birth weight standard deviation score</b> | -0.06                   | -0.08 to -0.03 | <0.001   | -0.01                              | -0.04 to 0.02 | 0.661    |

  

| <b>Males (n =699)</b>                        | <b>Unadjusted model</b> |               |          | <b>Adjusted model <sup>a</sup></b> |               |          |
|----------------------------------------------|-------------------------|---------------|----------|------------------------------------|---------------|----------|
|                                              | $\beta$                 | CI            | <i>P</i> | $\beta$                            | CI            | <i>P</i> |
| <b>Birth weight (g)</b>                      | -8.0                    | -21.1 to 5.0  | 0.228    | 1.9                                | -13.6 to 17.5 | 0.808    |
| <b>Birth weight standard deviation score</b> | -0.01                   | -0.04 to 0.01 | 0.232    | 0.00                               | -0.02 to 0.03 | 0.795    |

Data are B coefficients ( $\beta$ ) and (95% confidence interval (CI)) for the change in outcome per unit increase in adiponectin (microgram/mL).

Data were analyzed using linear regression models.

<sup>a</sup> Adjustments were made for early pregnancy BMI and diabetes mellitus (pregestational or gestational).

**Supplementary Table S6.** Associations between maternal adiponectin levels and the likelihood of giving birth to an infant large-for-gestational-age (LGA), female and male infants analyzed separately.

| <b>Females (n =650)</b> | <b>Unadjusted model</b> |             |          | <b>Adjusted model <sup>a</sup></b> |             |          |
|-------------------------|-------------------------|-------------|----------|------------------------------------|-------------|----------|
|                         | OR                      | CI          | <i>P</i> | OR                                 | CI          | <i>P</i> |
| <b>LGA</b>              | 0.88                    | 0.80 – 0.97 | 0.013    | 1.02                               | 0.91 – 1.13 | 0.740    |

  

| <b>Males (n =699)</b> | <b>Unadjusted model</b> |             |          | <b>Adjusted model <sup>a</sup></b> |             |          |
|-----------------------|-------------------------|-------------|----------|------------------------------------|-------------|----------|
|                       | OR                      | CI          | <i>P</i> | OR                                 | CI          | <i>P</i> |
| <b>LGA</b>            | 0.94                    | 0.86 – 1.03 | 0.164    | 0.98                               | 0.88 – 1.09 | 0.653    |

Data are odds ratios (OR) (95% confidence interval (CI)) for the change in outcome per unit increase in adiponectin (microgram/mL).

Data were analyzed using logistic regression models.

<sup>a</sup> Adjustments were made for early pregnancy BMI and diabetes mellitus (pregestational or gestational).
